# Supplementary material
Source: Research Square preprint supplement (doi:10.21203/rs.3.rs-10311360/v1)
Supplement: Supplementary file 1 [file 9d2b8417623087b114b62f49.docx]

**Appendix. Data construction and methodological details**

***A.1 Food coding and caliber splicing***

The CHNS uses two food-coding systems within the sample period. The waves of 1989–2000 and 2004–2011 belong to different systems, whose major-group calibers are inconsistent, creating a structural break in the consumption vector between 2000 and 2004, concentrated in an opposite jump of the grain and vegetable shares and arising from the differing classification of mixed-dish components under the two recording modes. The splice correction takes the difference between the grain-share trend of the four later waves extrapolated to 2000 and that of the five earlier waves extrapolated to 2000 as a shift, adjusts the grain and vegetable shares of the earlier waves by this shift, and renormalises. The correction makes the share series continuous at the splice while preserving the within-segment share variation of each coding segment.

***A.2 Unit conversion***

In the individual dietary recall, intake is recorded in *liang* (about 50 g) for 1989–2000 and in grams for 2004–2011. This paper multiplies the 1989–2000 records by 50 to convert them to grams. After conversion, the per-capita daily dietary energy of each wave is of the same order as the energy baseline of the CHNS macronutrient files.

***A.3 Methodological details***

The point cloud of the CLR-transformed structural sequence and its principal-component analysis are carried out within the zero-sum hyperplane. The distance from the base, net displacement, path length and directional efficiency are all quantities under the Aitchison distance; directional efficiency is the ratio of net displacement to total path length. The isotropic null distribution is obtained by Monte Carlo simulation, fixing each period’s step length and drawing each period’s direction uniformly at random within the zero-sum hyperplane, repeated 10,000 times. The null distribution of the Mann–Kendall joint test is obtained by shuffling the time order of the nine waves, repeated 5,000 times. The bootstrap uses the household as the clustering unit, resampling households with replacement within each wave, repeated 2,000 times.
